# Supplementary material for: Long-Term Projection of Water Cycle Changes over China Using RegCM
Source: MDPI journal article supplement (doi:10.3390/rs13193832), 2021-09-25
Supplement: s1 [file s1]

## **Supplementary Materials**

### **Long-Term Projection of Water Cycle Changes over China Using RegCM**

Chen Lu<sup>1</sup>, Guohe Huang<sup>1,\*</sup>, Guoqing Wang<sup>2</sup>, Jianyun Zhang<sup>2</sup>, Xiuquan Wang<sup>3</sup>, and Tangnyu Song<sup>1</sup>

1. Faculty of Engineering and Applied Science, University of Regina, Regina, Saskatchewan, Canada S4S 0A2

2. State Key Laboratory of Hydrology–Water Resources and Hydraulic Engineering, Nanjing Hydraulic Research Institute, Nanjing 210029, China

3. School of Climate Change and Adaptation, University of Prince Edward Island, 550 University Ave, Charlottetown, PE C1A 4P3, Canada

\* Corresponding author. Faculty of Engineering and Applied Science, University of Regina, Regina, Saskatchewan, Canada S4S 0A2

Tel: +1-306-585-4095

Fax: +1-306-585-5755

Email: [huangg@uregina.ca](mailto:huangg@uregina.ca)

Keywords: Climate change, China, water cycle, precipitation, evapotranspiration, runoff, projection

Table S1. Spatial correlation between RegCM-generated results and observations, remote sensing data, and reconstructed data.

|                    | ERA-RegCM   |             |             |             |             | GFDL-RegCM  |             |             |             |             |
|--------------------|-------------|-------------|-------------|-------------|-------------|-------------|-------------|-------------|-------------|-------------|
|                    | Annual      | Winter      | Spring      | Summer      | Autumn      | Annual      | Winter      | Spring      | Summer      | Autumn      |
| Temperature        |             |             |             |             |             |             |             |             |             |             |
| CRU                | <b>0.97</b> | <b>0.96</b> | <b>0.97</b> | <b>0.97</b> | <b>0.97</b> | <b>0.97</b> | <b>0.96</b> | <b>0.97</b> | <b>0.97</b> | <b>0.97</b> |
| NIMC               | <b>0.97</b> | <b>0.97</b> | <b>0.95</b> | <b>0.94</b> | <b>0.94</b> | <b>0.98</b> | <b>0.97</b> | <b>0.95</b> | <b>0.97</b> | <b>0.95</b> |
| Precipitation      |             |             |             |             |             |             |             |             |             |             |
| CRU                | <b>0.60</b> | <b>0.29</b> | <b>0.60</b> | <b>0.69</b> | <b>0.49</b> | <b>0.61</b> | <b>0.32</b> | <b>0.65</b> | <b>0.70</b> | <b>0.34</b> |
| NIMC               | <b>0.65</b> | <b>0.29</b> | <b>0.68</b> | <b>0.68</b> | <b>0.43</b> | <b>0.47</b> | <b>0.29</b> | <b>0.65</b> | <b>0.51</b> | <b>0.28</b> |
| Evapotranspiration |             |             |             |             |             |             |             |             |             |             |
| MODIS              | <b>0.61</b> | <b>0.6</b>  | <b>0.6</b>  | <b>0.51</b> | <b>0.34</b> | <b>0.61</b> | <b>0.46</b> | <b>0.6</b>  | <b>0.47</b> | <b>0.33</b> |
| GLEAM              | <b>0.82</b> | <b>0.85</b> | <b>0.77</b> | <b>0.82</b> | <b>0.48</b> | <b>0.78</b> | <b>0.72</b> | <b>0.78</b> | <b>0.75</b> | <b>0.52</b> |
| NIMC               | <b>0.50</b> | <b>0.63</b> | <b>0.51</b> | -0.20       | 0.18        | <b>0.42</b> | <b>0.67</b> | 0.23        | 0.01        | 0.21        |
| Runoff             |             |             |             |             |             |             |             |             |             |             |
| GRUN               | <b>0.67</b> | <b>0.47</b> | <b>0.37</b> | <b>0.66</b> | <b>0.69</b> | <b>0.66</b> | <b>0.53</b> | <b>0.40</b> | <b>0.65</b> | <b>0.66</b> |

Notes: Figures in bold font indicates the correlation coefficient is statistically significant at a  $\alpha$  level of 0.05.

Table S2. Spatial correlation between raw GFDL data and observations.

|               | Annual | Winter | Spring | Summer | Autumn |
|---------------|--------|--------|--------|--------|--------|
| Temperature   |        |        |        |        |        |
| CRU           | 0.90   | 0.94   | 0.89   | 0.86   | 0.91   |
| NIMC          | 0.90   | 0.88   | 0.91   | 0.92   | 0.84   |
| Precipitation |        |        |        |        |        |
| CRU           | 0.60   | 0.40   | 0.59   | 0.73   | 0.35   |
| NIMC          | 0.57   | 0.51   | 0.33   | 0.56   | 0.39   |

\* Notes: All figures are statistically significant at a  $\alpha$  level of 0.05.

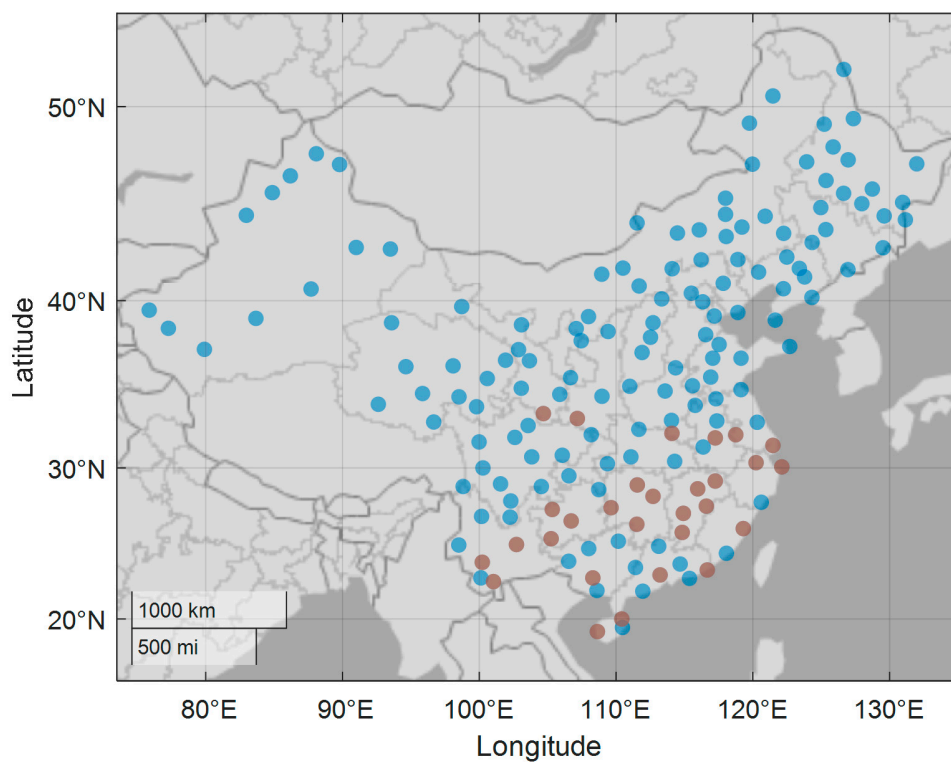

Figure S1. Location of NIMC weather stations. Note: Red dots indicate selected stations for evapotranspiration data. The NIMC tank evaporation data contains a large number of missing data; the stations are selected if the percentage of missing data is less than 50% for each season.

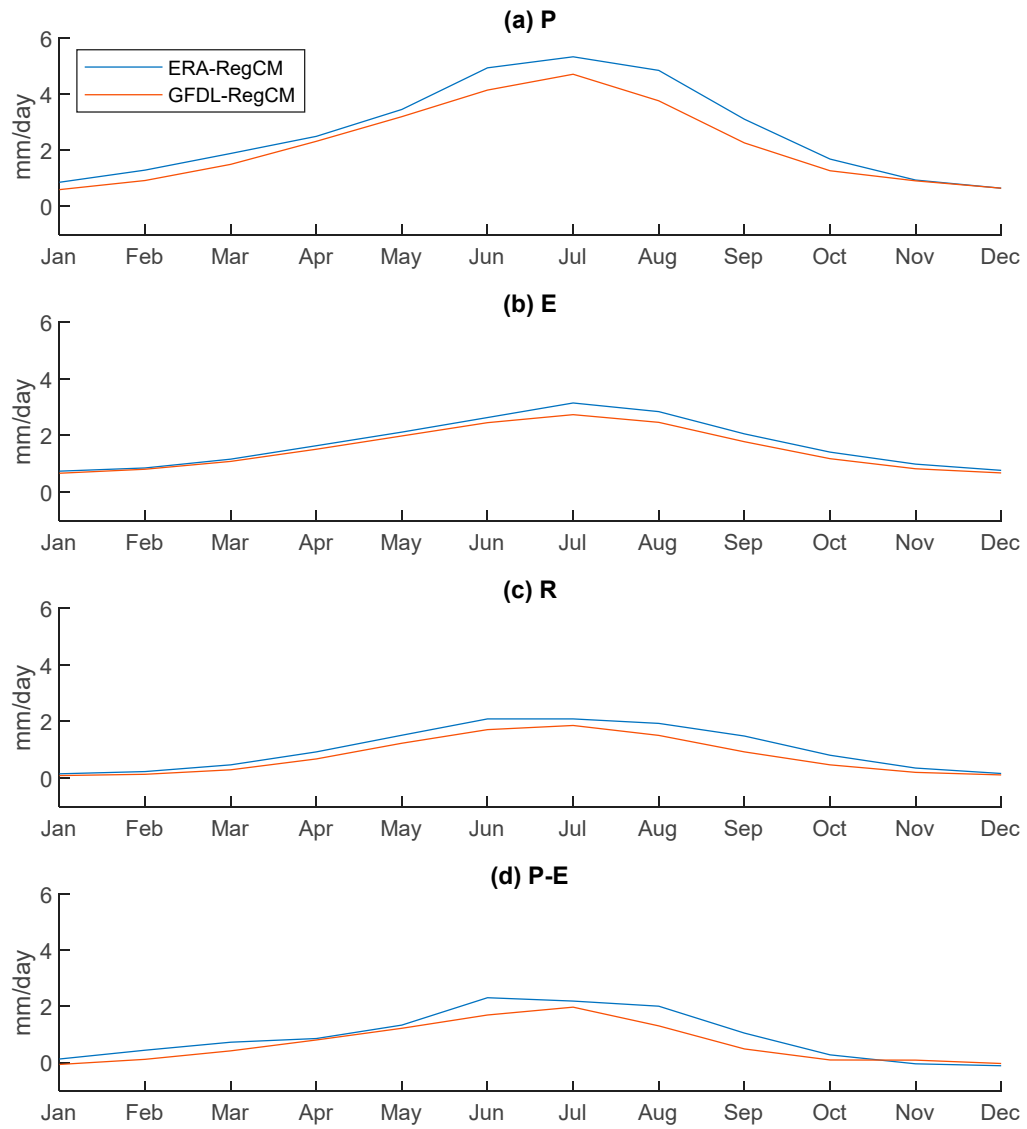

Figure S2. Simulated annual cycles for precipitation, evapotranspiration, runoff, and the difference between precipitation and evapotranspiration in the baseline period. The  $R^2$ 's for the two sets of RegCM results are 0.88, 0.92, 0.83, and 0.82, respectively for precipitation, evapotranspiration, runoff, and the difference between precipitation and evapotranspiration.
